# Supplementary material
Source: publisher figshare collection journal article supplement (https://acs.figshare.com/ndownloader/files/4468024)

## **Supporting Information for**

### **Alginate Polymer Caged C<sub>18</sub> Functionalized Magnetic Titanate Nanotubes for Fast and Efficient Extraction of Phthalate Esters from Water Samples with Complex Matrix**

Hongyun Niu, Shengxiao Zhang, Xiaole Zhang, Yaqi Cai\*

*State Key Laboratory of Environmental Chemistry and Ecotoxicology, Research Center for Eco-Environmental Science, Chinese Academy of Sciences, Beijing, China 100085,*

**Characterization of Adsorbents.** Transmission electron micrograph (TEM) images of adsorbents were recorded on a H7500 transmission electron micrograph (Hitachi, Japan) operating at 120 kV. Scanning electron micrograph (SEM) images were performed on an S-3000N electron microscope equipped with an energy-dispersive X-ray spectroscopy (EDAX) (Hitachi, Japan). An X-ray powder diffractometer (Rigaku III/B max) was used to analyze the crystalline structures of adsorbents. The radiation source was Cu K $\alpha$ , the applied current was 30 mA, and the voltage was 40 kV. During the analysis, the sample was scanned from 5 to 100° at a speed of 0.4°/min. The specific surface areas of adsorbents were determined by the BET method with N<sub>2</sub> gas (ASAP2000V3.01A; Micromeritics, Norcross, GA). A Nicolet Avatar 360 spectrometer was used for the FTIR determination of samples. Magnetic property of the adsorbents was analyzed using a vibrating sample magnetometer (VSM, LDJ9600).

**HPLC Analysis.** Phthalate esters were separated and quantified by using a high-performance liquid chromatography (HPLC) system (DIONEX, USA). The HPLC equipment include a DIONEX P680 HPLC pump, an on-line connected degasser Solvent Rack SOR-100, a thermostated column compartment TCC-100, a DIONEX RF 2000 fluorescence detector (FLD), and a PDA-100 photodiode array detector. The separations were conducted on a Diamonsil<sup>®</sup> C<sub>18</sub> column (250×4.6 mm; particle size, 5  $\mu$ m). Gradient separations were carried out using water-acetonitrile (50:50) and acetonitrile as the A and B solvents respectively, and the flow rate was 1 mL min<sup>-1</sup>. The linear gradient profile was as following: B maintained at 40% in the

first 15 min, then changed to 100% within 10 min, and held for 10 min, after that, the mobile phase was returned to the initial conditions in 3 min. Phthalate esters were quantified by UV detector and the wavelengths were set at 226 nm.

**Sample Collection.** River water sample was collected from North moat of Beijing, whose water storage was affected greatly by the urban stormwater runoff. A wastewater sample was taken from the effluent discharge gate of the biggest municipal wastewater treatment plant in Beijing (Chaoyang District, Beijing). A tap water was sampled from our laboratory and rain water was collected at 10 June, 2009 in Haidian District (Beijing). All samples were filtered through 0.22  $\mu\text{m}$  filters (Shanghai Institute of Pharmaceutical Industry, China) to remove the suspended solids and stored at 4 °C until use.

**Table S1 Saturation Magnetization, Remanence, Coercivity of Fe<sub>3</sub>O<sub>4</sub>-TNs with Different Fe<sub>3</sub>O<sub>4</sub>/TNs Ratio and C<sub>18</sub> Functionalized Fe<sub>3</sub>O<sub>4</sub> (0.5) with or without Alginate Coat**

| Sample                                                   | saturation magnetization<br>(emu/g) | remanence<br>(emu/g) | coercivity<br>(Oe) |
|----------------------------------------------------------|-------------------------------------|----------------------|--------------------|
| Fe <sub>3</sub> O <sub>4</sub> (0.4)                     | 7.176                               | 0.8718               | 36                 |
| Fe <sub>3</sub> O <sub>4</sub> (0.6)                     | 19.85                               | 3.967                | 54                 |
| Fe <sub>3</sub> O <sub>4</sub> (0.5)                     | 10.99                               | 1.376                | 16                 |
| Fe <sub>3</sub> O <sub>4</sub> (0.5)-C <sub>18</sub>     | 9.745                               | 1.016                | 18                 |
| ALG@Fe <sub>3</sub> O <sub>4</sub> (0.5)-C <sub>18</sub> | 7.299                               | 0.7471               | 10                 |

**Table S2 Recoveries of Analytes in the Presence of 100 mg L<sup>-1</sup> of Biphthalate****Acid or n-Decanoic Acid at pH 3.0 and 9.5**

| Analytes               | Recovery (%) |      |      |      |
|------------------------|--------------|------|------|------|
|                        | DPP          | DBP  | DCP  | DOP  |
| Biphthalate acid pH3.0 | 42.8         | 100  | 85.7 | 89.6 |
| Biphthalate acid pH9.5 | 68.2         | 102  | 89.3 | 94.5 |
| n-Decanoic acid, pH3.0 | 34.5         | 73.3 | 75.5 | 96.6 |
| n-Decanoic acid, pH9.5 | 60.8         | 106  | 87.6 | 92.4 |

**Table S3 Analytical Parameters of the Proposed Method**

|     | Calibration Equation   | R <sup>2</sup> | Linear Range<br>(ng L <sup>-1</sup> ) | Detection Limits <sup>a</sup><br>(ng L <sup>-1</sup> ) |
|-----|------------------------|----------------|---------------------------------------|--------------------------------------------------------|
| DPP | $y = 0.8609x - 0.047$  | 0.998          | 60-10 000                             | 24.4                                                   |
| DBP | $y = 0.5039x + 0.1292$ | 0.99           | 60-10 000                             | 14.3                                                   |
| DCP | $y = 1.0383x - 0.0313$ | 0.999          | 60-10 000                             | 35.9                                                   |
| DOP | $y = 0.4106x + 0.0605$ | 0.998          | 60-10 000                             | 11.2                                                   |

<sup>a</sup> The detection limits were calculated by using S/N=3

**Table S4 Results of Determination and Recoveries of Real Water Samples Spiked with Target Analytes**

| Water sample     | Spiked<br>(ng mL <sup>-1</sup> ) | Detected (ng mL <sup>-1</sup> ) <sup>a</sup> ± R.S.D. <sup>b</sup> (Recovery %) |                      |                      |                     |
|------------------|----------------------------------|---------------------------------------------------------------------------------|----------------------|----------------------|---------------------|
|                  |                                  | DPP                                                                             | DBP                  | DCP                  | DOP                 |
| Tap water        | 0                                | nd <sup>c</sup>                                                                 | 0.55±10              | nd                   | 0.28±5.3            |
|                  | 0.2                              | 0.19±7.3<br>(95.5%)                                                             | 0.75±5.8<br>(100%)   | 0.21±4.0<br>(107%)   | 0.49±4.4<br>(101%)  |
|                  | 2.0                              | 1.83±10.1<br>(91.4%)                                                            | 2.48±10.9<br>(96.5%) | 2.05±6.6<br>(103%)   | 2.25±5.2<br>(98.3%) |
| Rainwater        | 0                                | 0.056±3.3                                                                       | 0.44±8.3             | nd                   | 0.75±11             |
|                  | 0.2                              | 0.23±0.93<br>(87.2%)                                                            | 0.65±2.5<br>(106%)   | 0.20±3.8<br>(102%)   | 0.94±6.3<br>(97.0%) |
|                  | 2.0                              | 1.82±4.2<br>(88.4%)                                                             | 2.45±4.9<br>(101%)   | 1.93±0.32<br>(96.6%) | 2.73±4.9<br>(99.2%) |
| Wastewater       | 0                                | 0.034±2.5                                                                       | 0.25±3.0             | nd                   | 0.15±6.0            |
|                  | 0.2                              | 0.21±8.2<br>(88.2%)                                                             | 0.42±2.8<br>(86.5%)  | 0.22±3.2<br>(109%)   | 0.35±8.3<br>(101%)  |
|                  | 2.0                              | 1.86±3.9<br>(91.5%)                                                             | 2.34±5.9<br>(104%)   | 1.98±7.9<br>(99.1%)  | 2.23±5.2<br>(104%)  |
| North Moat Water | 0                                | nd                                                                              | 0.10±0.6             | nd                   | 0.064±8.5           |
|                  | 0.2                              | 0.18±9.8<br>(92.2%)                                                             | 0.29±6.8<br>(96.9%)  | 0.19±6.1<br>(95.3%)  | 0.25±3.1<br>(93.1%) |
|                  | 2                                | 1.69±6.0<br>(84.6%)                                                             | 1.97±1.8<br>(93.4%)  | 2.02±2.6<br>(101%)   | 2.11±1.1<br>(102%)  |

<sup>a</sup>. Mean of three determinations, <sup>b</sup>. Standard deviation for three determinations. <sup>c</sup>. Not detected.

**Figure S1 TEM images of (a)  $\text{Fe}_3\text{O}_4$ -TNs prepared without ferric and ferrous ions in solution in the alkali treatment process; (b)  $\text{Fe}_3\text{O}_4$ -TNs prepared without ion-exchange process; (c)  $\text{Fe}_3\text{O}_4$  (0.6)-TNs; and (d)  $\text{Fe}_3\text{O}_4$  (1)-TNs**

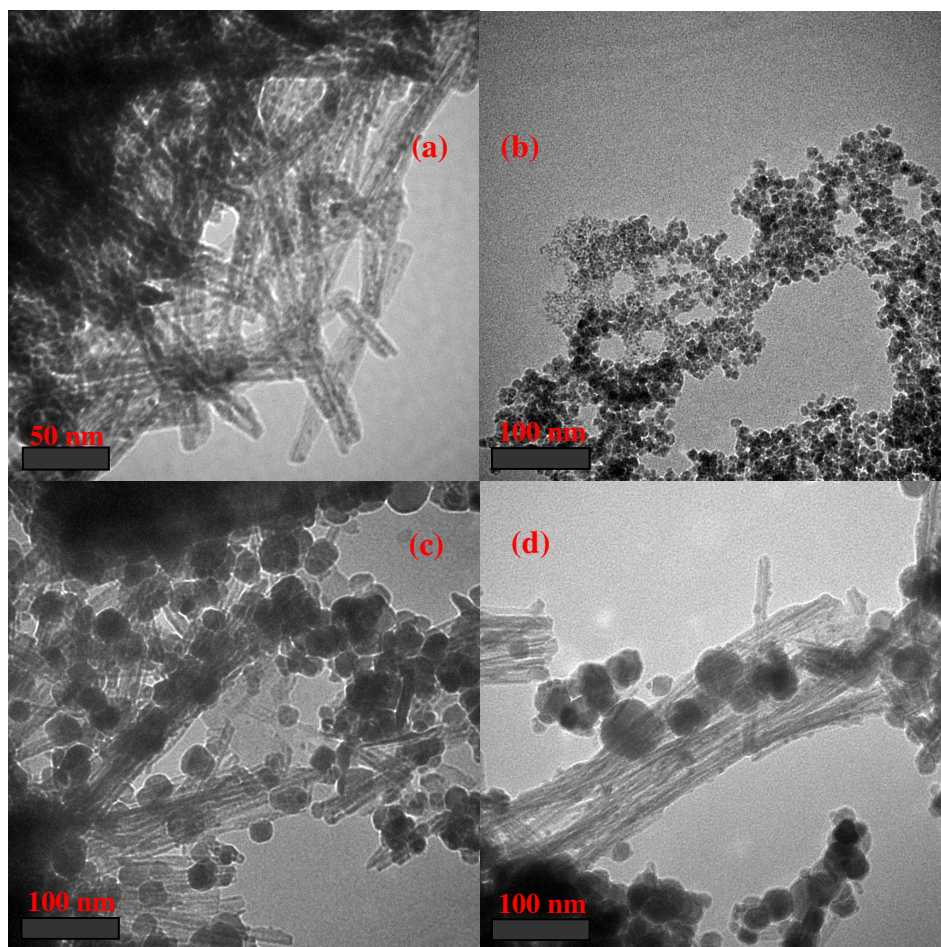



Figure S2. VSM magnetization curves of  $\text{Fe}_3\text{O}_4$  (0.4),  $\text{Fe}_3\text{O}_4$  (0.5),  $\text{Fe}_3\text{O}_4$  (0.6),  $\text{C}_{18}\text{-Fe}_3\text{O}_4$  (0.5)-TNs, and ALG@  $\text{C}_{18}\text{-Fe}_3\text{O}_4$  (0.5)-TNs

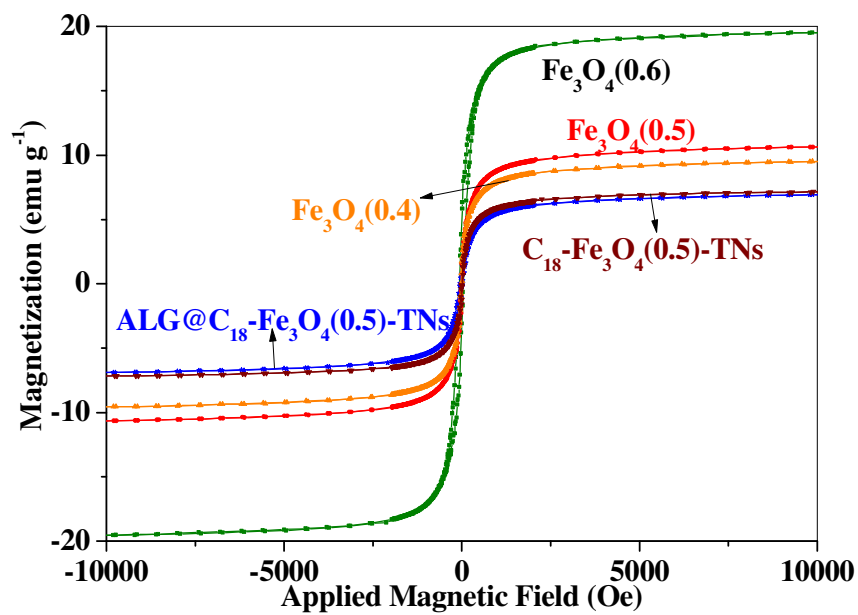

**Figure S3 IR spectra of TNs, Fe<sub>3</sub>O<sub>4</sub>-TNs, C<sub>18</sub>-Fe<sub>3</sub>O<sub>4</sub>-TNs, and ALG@C<sub>18</sub>-Fe<sub>3</sub>O<sub>4</sub>-TNa**

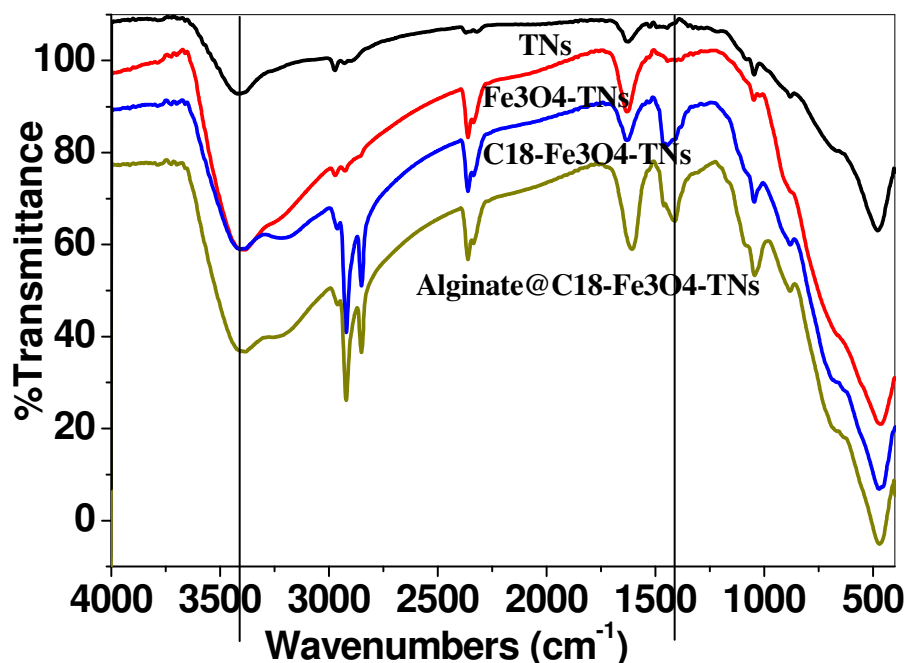

The peaks at 1635 and 3420 cm<sup>-1</sup> present in the FTIR spectrum of TNs were corresponding to the surface-adsorbed water and hydroxyl groups (1-4). In the spectrum of Fe<sub>3</sub>O<sub>4</sub>-TNs composite, the intensity of the two peaks increased obviously, resulting from the introduced Fe<sub>3</sub>O<sub>4</sub>. The peaks at 2973 and 2929 cm<sup>-1</sup> were unchanged which attributed to stretching vibration or bending vibration of Ti-OH or Ti-O bonds of TNs (1, 3). After functionalization with C<sub>18</sub>, O-H absorption at 3420 and 1620 cm<sup>-1</sup> decreased, and the peaks for Ti-OH bonds were nearly overlapped by the new two peaks at 2920 and 2850 cm<sup>-1</sup> which were ascribed to C-H bond (1, 3). A peak appeared in the range of 1450-1500 cm<sup>-1</sup> for C<sub>18</sub>-Fe<sub>3</sub>O<sub>4</sub>-TNs was caused by the bending vibration of -CH<sub>2</sub> species of C<sub>18</sub> group (5). This indicated that the C<sub>18</sub> chain

was successfully attached to the magnetic nanoparticles by replacing the hydroxyl groups on the surface. After encapsulated into barium alginate vesicles, O-H absorption increased again, and the adsorption peak for carboxylic group at  $1413\text{ cm}^{-1}$  could be observed (6). The hydroxyl groups and carboxylic groups resulted from alginate, and this result indicated that alginate was successfully coated on the surface of  $\text{C}_{18}\text{Fe}_3\text{O}_4\text{-TNs}$  adsorbents.

- (1) W. Wang, J. W. Zhang, H. Z. Huang, Z. S. Wu, Z. J. Zhang. Surface-modification and characterization of H-titanate nanotube. *J. Colloid Surface A: Physicochem. Eng. Aspect* **2008**, 317, 270-276.
- (2) G. S. Guo, C. N. He, Z. H. Wang, F. B. Gu, D. M. Han. Synthesis of titania and titanate nanomaterials and their application in environmental analytical chemistry. *Talanta* **2007**, 72, 1687–1692.
- (3) V. Štengl, S. Bakardjieva, J. Šubrt, E. Večerníková, L. Szatmary, M. Klementová, V. Balek. Sodium titanate nanorods: preparation, microstructure characterization and photocatalytic activity. *Applied Catalysis B: Environmental* **2006**, 63, 20–30.
- (4) D.R. Simon, E.M. Kelder, M. Wagemaker, F.M. Mulder, J. Schoonman. Characterization of proton exchanged  $\text{Li}_4\text{Ti}_5\text{O}_{12}$  spinel material. *Solid State Ionics* **2006**, 177, 2759–2768.
- (5) Shi, B. F.; Wang, Y. S.; Guo, Y. L.; Wang, Y. Q.; Wang, Y.; Guo, Y.; Zhang, Z. G.; Liu, X. H.; Lu, G. Z. Aminopropyl-functionalized silicas synthesized by W/O microemulsion for immobilization of penicillin G acylase. *Catal. Today* (2009), doi: [10.1016/j.cattod.2009.02.014](https://doi.org/10.1016/j.cattod.2009.02.014)
- (6) Zhao, H. Y.; Zheng, W.; Meng, Z. X.; Zhou, H. M.; Xu, X. X.; Li, Z.; Zheng, Y. F. Bioelectrochemistry of hemoglobin immobilized on a sodium alginate-multiwall carbon nanotubes composite film. *Biosens. Bioelectron.* **2009**, 24, 2352-2357.

**Figure S4. Effect of humic acid concentration in neutral solution on the extraction efficiencies of phthalate esters**

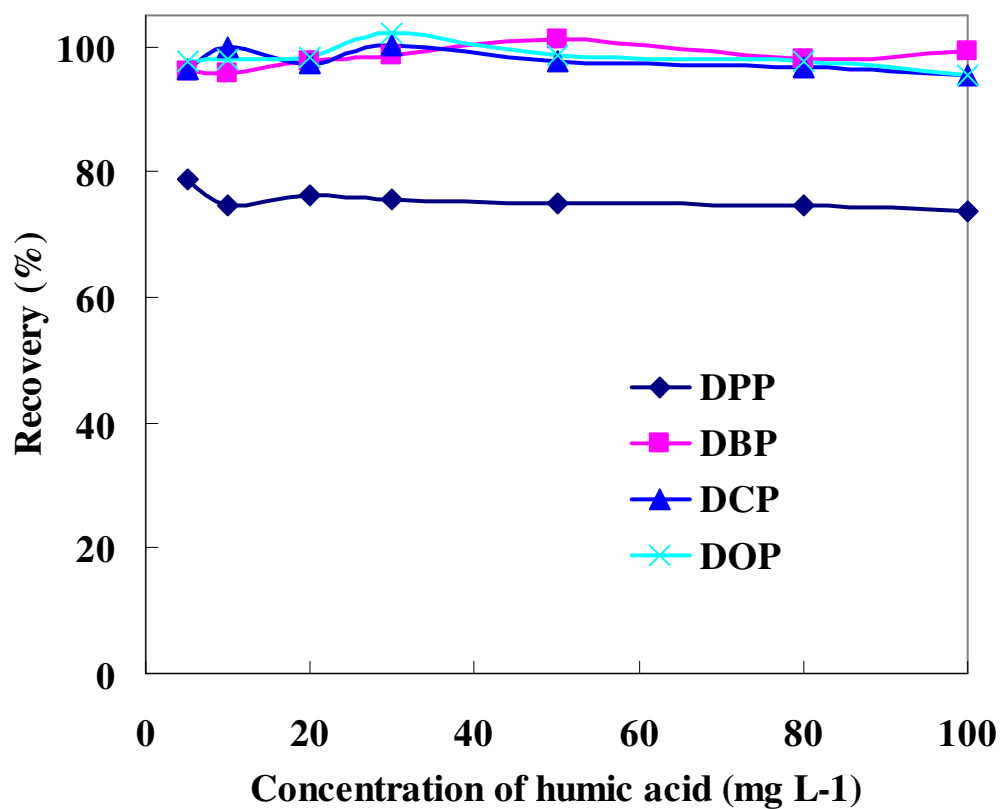

Supplement: Supplementary file 1 [file 4468024]
